# Supplementary material for: Analysis of Mitochondrial Function and Localisation during Human Embryonic Stem Cell Differentiation In Vitro
Source: PubMed Central journal article supplement (PMC3526579; doi:10.1371/journal.pone.0052214), 2012-12-19
Supplement: pone.0052214.s002.pdf [file pone.0052214.s002.pdf]

# Supplementary Figure S2

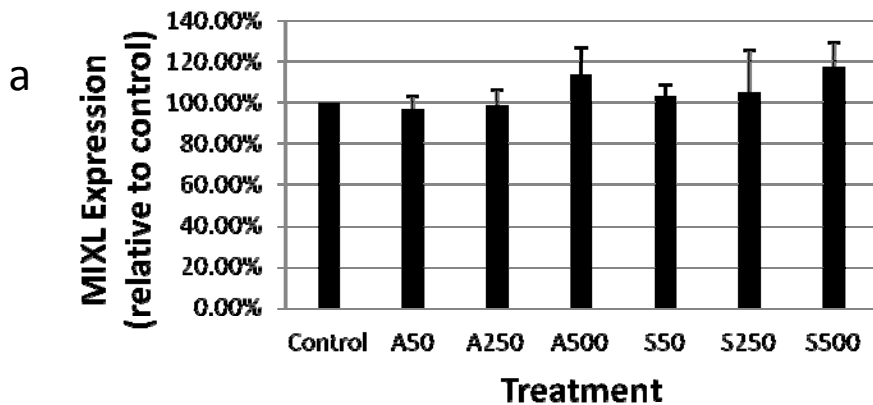

b

| Relative to positive control |         |         |         |         |         |         |         |         |        |
|------------------------------|---------|---------|---------|---------|---------|---------|---------|---------|--------|
| Replicate                    | 1       | 2       | 3       | 4       | 5       | 6       | 7       | Average | SD     |
| Control                      | 100.00% | 100.00% | 100.00% | 100.00% | 100.00% | 100.00% | 100.00% | 100.00% | 0.00%  |
| A50                          | n/a     | 85.82%  | 95.70%  | 102.99% | 101.68% | 98.77%  | 94.95%  | 96.65%  | 6.18%  |
| A250                         | n/a     | 86.83%  | 90.72%  | 102.40% | 104.70% | 102.19% | 103.03% | 98.31%  | 7.54%  |
| A500                         | 116.02% | 100.19% | 133.38% | 101.87% | dead    | 115.57% | dead    | 113.41% | 13.40% |
| S50                          | n/a     | 101.29% | 113.72% | 101.53% | 100.22% | 101.78% | 99.21%  | 102.96% | 5.36%  |
| S250                         | n/a     | 109.75% | 120.58% | 102.39% | 104.25% | 125.68% | 67.79%  | 105.07% | 20.42% |
| S500                         | 110.60% | 128.02% | 126.43% | 104.29% | dead    | dead    | dead    | 117.33% | 11.72% |

c

|              | PBS as diluent |           |            |            | With DMSO as diluent |            |            | Average | SD       |
|--------------|----------------|-----------|------------|------------|----------------------|------------|------------|---------|----------|
|              | 19/11/2010     | 8/11/2010 | 26/09/2010 | 29/10/2010 | 2/03/2010            | 27/04/2010 | 16/03/2010 |         |          |
| bFGF Control | 1.71%          | 0.79%     | 1.35%      | 3.41%      | 3.20%                | 4.80%      | 3.20%      | 3%      | 0.011287 |
| Pos Control  | 78.61%         | 56.50%    | 43.74%     | 87.36%     | 89.40%               | 73.20%     | 89.10%     | 74%     | 0.176427 |
| A50          |                | 48.49%    | 41.86%     | 89.97%     | 90.90%               | 72.30%     | 84.60%     | 71%     | 0.046881 |
| A250         |                | 49.06%    | 39.68%     | 89.46%     | 93.60%               | 74.80%     | 91.80%     | 73%     | 0.066327 |
| A500         | 91.20%         | 56.61%    | 58.34%     | 88.99%     |                      | 84.60%     |            | 76%     | 0.194903 |
| S50          |                | 57.23%    | 49.74%     | 88.70%     | 89.60%               | 74.50%     | 88.40%     | 75%     | 0.052962 |
| S250         |                | 62.01%    | 52.74%     | 89.45%     | 93.20%               | 92%        | 60.40%     | 75%     | 0.065549 |
| S500         | 86.94%         | 72.33%    | 55.30%     | 91.11%     |                      |            |            | 76%     | 0.158354 |

## Supplementary Figure S2. MIXL1 expression post treatment with biogenesis agents .

a) AICAR and SNAP at 500 $\mu$ M in the presence of BMP4 and Activin A increase MIXL1 expression relative to controls. b) Individual replicate data represented in part "a" expressed as MIXL expression relative to control. c) Raw data of MIXL expression expressed as percentage positive for MIXL expression. n/a = test not performed, Dead = cell death prohibited analysis, A = AICAR, S = SNAP, concentrations listed as A50, A250 etc represent  $\mu$ M, S = SNAP, A = AICAR, M = Metformin.
