# Supplementary material for: Analysis of Mitochondrial Function and Localisation during Human Embryonic Stem Cell Differentiation In Vitro
Source: PubMed Central journal article supplement (PMC3526579; doi:10.1371/journal.pone.0052214), 2012-12-19
Supplement: pone.0052214.s006.pdf [file pone.0052214.s006.pdf]

# Supplementary Method S1: Transfection

Twelve well plates were coated with Geltrex (1:200, 700 $\mu$ L/well) for 1 hour prior to transfection. MEL2 cells, p32 (manual dissection) +3 (bulk culture) +11 (single cells) were treated with Rock inhibitor (Y27632, 10 $\mu$ M final concentration, Sigma Aldrich, St Louis, MO, USA) for 1 hour prior to transfection. One millilitre of StemPro<sup>®</sup> media was added to each well and incubated at 37 $^{\circ}$ C, 5% CO<sub>2</sub> immediately prior to transfection. Single cells were detached using cell dissociation buffer. Cells were resuspended at 1x10<sup>6</sup> cells/100 $\mu$ L in Human Stem Cell Nucleofector<sup>®</sup> Solution 2 (Lonza, Waverley, Australia) containing 2 $\mu$ g/100 $\mu$ L of the DNA plasmid pEF/myc/mito/GFP (see supplementary material for plasmid structure). Plasmids were linearised using EcoRI prior to transfection. Cells were transfected using program B-016 on a Nucleofector<sup>®</sup> II cuvette device (Lonza, see Supplementary Material for transfection optimisation). Five hundred microlitres of StemPro<sup>®</sup> media was added to the cells and the entire solution transferred to one well of the pre-coated 12 well plate. Transfected cells were allowed to recover for 24hrs before selection in G418. Selection in G418 was conducted in gradual increments from 25 $\mu$ g/mL-300 $\mu$ g/mL over a three week period.

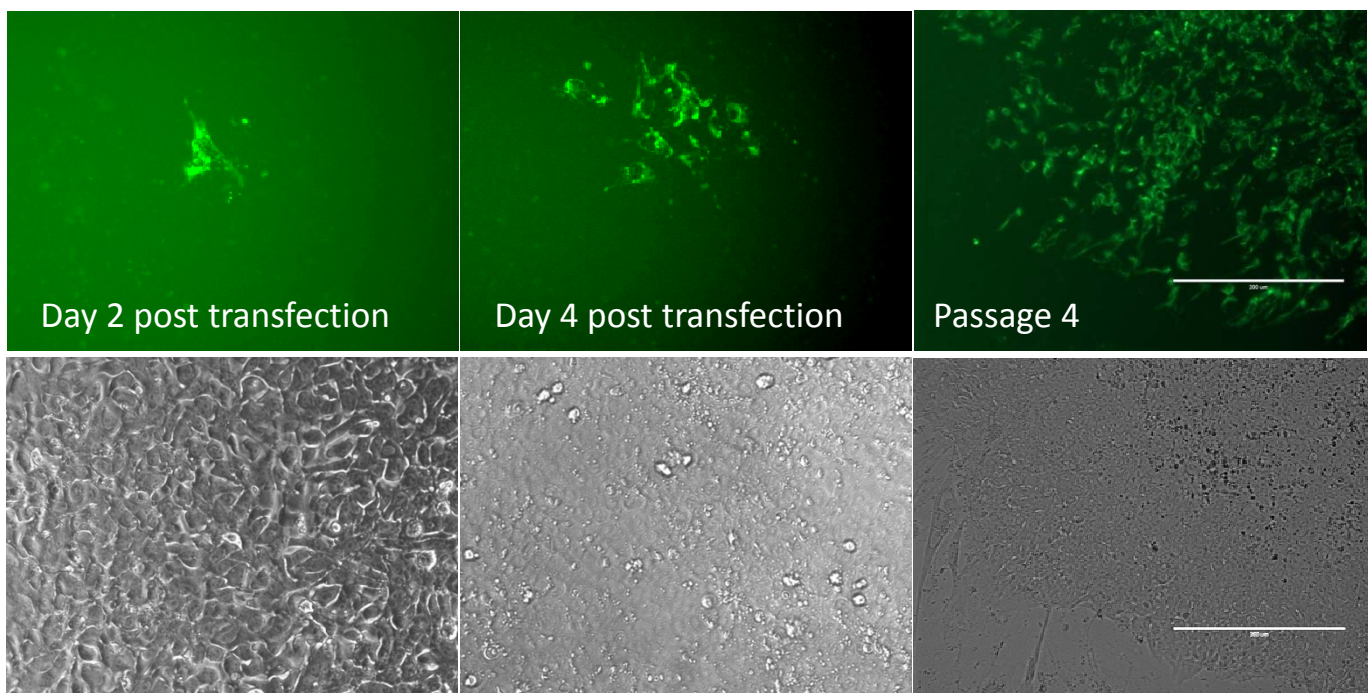

Supplementary Method S1. Early images of KMEL2 selection post transfection. MEL2 hESCs were transfected to label mitochondria as described in Supplementary Method S1. Scale bars are 200 $\mu$ m.
