# Supplementary material for: Analysis of Mitochondrial Function and Localisation during Human Embryonic Stem Cell Differentiation In Vitro
Source: PLOS journal article supplement (doi:10.1371/journal.pone.0052214), 2012-12-19
Supplement: S5 (10.1371/journal.pone.0052214.s005) [file journal.pone.0052214.s005]

# Supplementary Figure S5

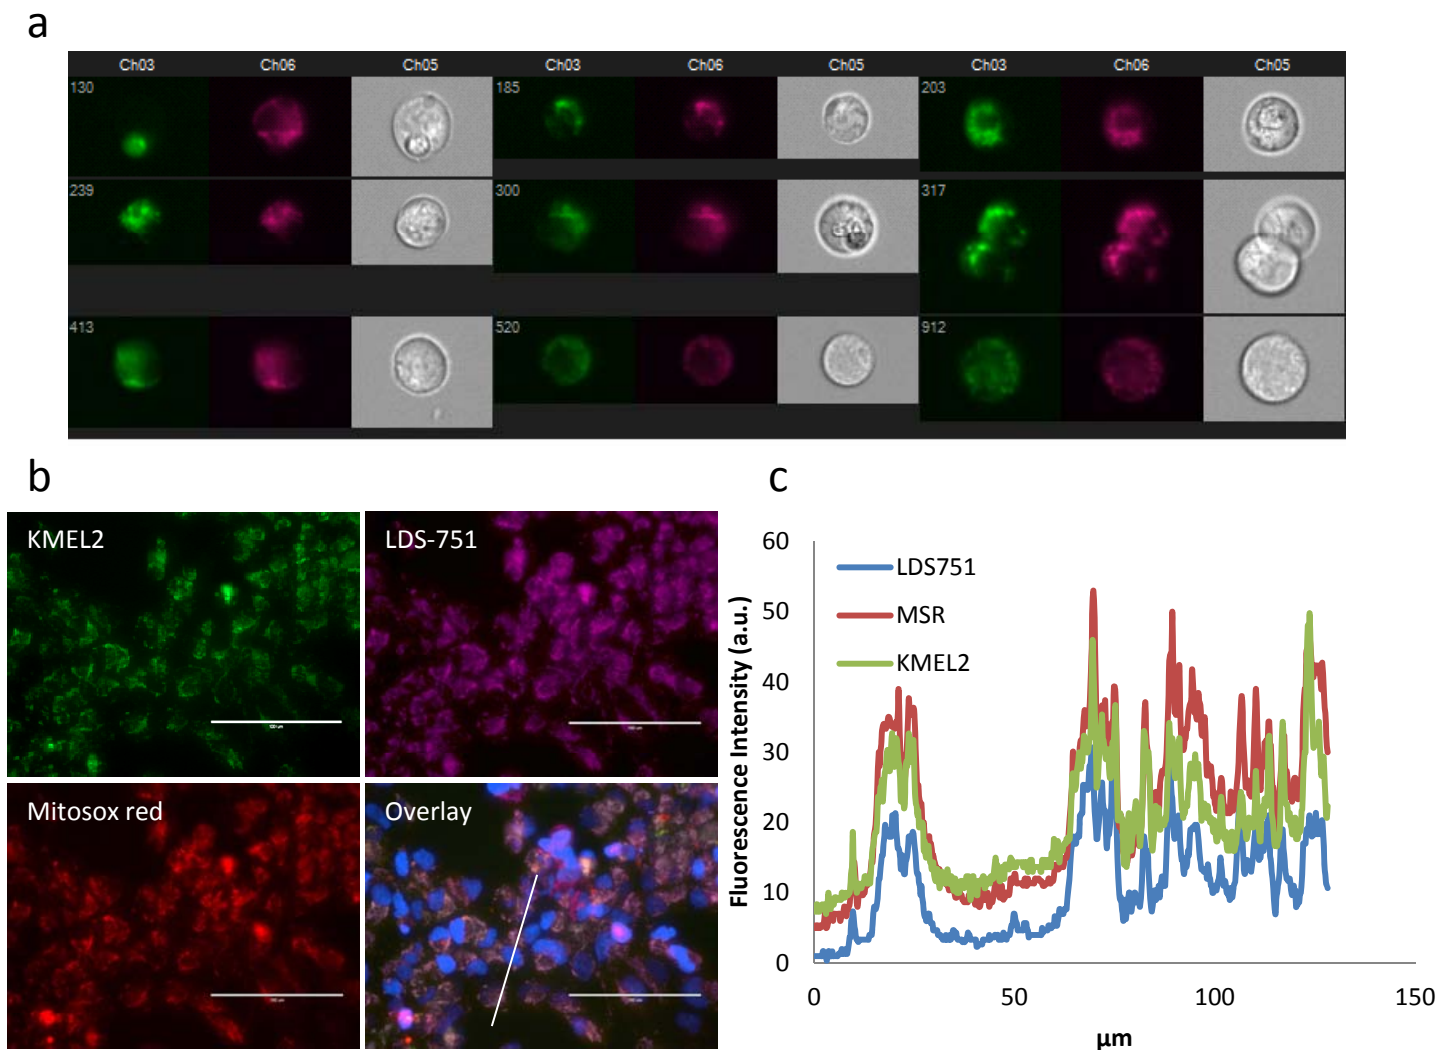

**Supplementary Figure S5. Mitochondria visualisation in KMEL2.** a) LDS-751 (pink) co-localises with GFP in KMEL2 cells (green). Images taken on an Amnis image stream. b) GFP, LDS-751 and Mitosox red co-localise in KMEL2 cells. c) Profile analysis of fluorescence intensity for each mitochondrial marker demonstrates overlapping of peak signals. Line of profile is shown in overlay image from “b”.
